# Supplementary material
Source: publisher site journal article supplement (https://www.dovepress.com/article/467909)
Supplement: Supplementary file 1 [file get_supplementary_file.php]

**Supplementary Materials**

**Supplementary Table 1. Physicochemical characterization of fluorescent PCL NPs.**

| Parameter |  |
| --- | --- |
| Ratio PCL/fluorescein (w/w) | 10:1 |
| PCL/FITC (w/w) (mg/mg) | 10:1 |
| Particle size distribution (nm) | 212.0 ± 2.17 |
| Polidispersity (PDI) | 0.363 ± 0.01 |
| z-potential (mV) | -11.3 ± 1.40 |

Physicochemical characterization of fluorescent PCL NPS.


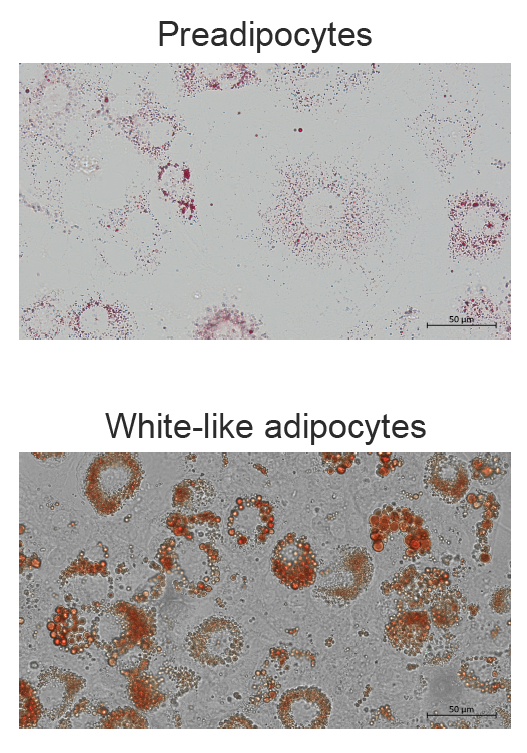


**Supplementary Figure 1. Morphological analysis of preadipocytes and white-like adipocytes differentiated.** Representative images of preadipocytes (up) and white-like adipocytes (down) at day 10 of differentiation stained with oil red. Cells were visualized by light microscopy with 20X magnification. Scale bar = 50 µm. The intracellular lipid droplets were stained with oil red reagent.


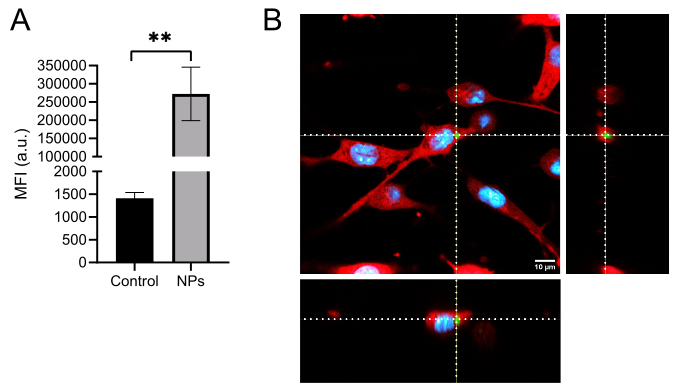


**Supplementary Figure 2.** **PCL NPs associate and internalize into A549 cells.** A) Median fluorescence intensity (MFI) quantification by flow cytometry on lung cancer A549 cells treated or not with 300 µg/mL of fluorescent PCL-fluorescein NPs after 24 h. Data are presented as mean ± SEM, with at least three independent experiments (n≥3) made in triplicate, and Student´s t-test. ** p<0.01 compared to Control group. B) Representative fluorescence images, acquired by laser scanning confocal microscopy, of the incorporation of PCL-fluorescein NPs (300 µg/mL) on lung cancer A549 cells after 24 h of incubation. Staining of cells is as follows: blue: DRAQ5-stained nuclei; red: calcein-red; and green: fluorescein-labeled PCL NPs. Each image is composed of a representative x, y projection of an optical section of the cells, along with its. Orthogonal projections in y, z and x, z, reconstructed from the optical section stacks, acquired with 1 μm of distance between each stack. Scale bars: 10 μm. Dotted lines: identification representative PCL-fluorescein NP cluster.


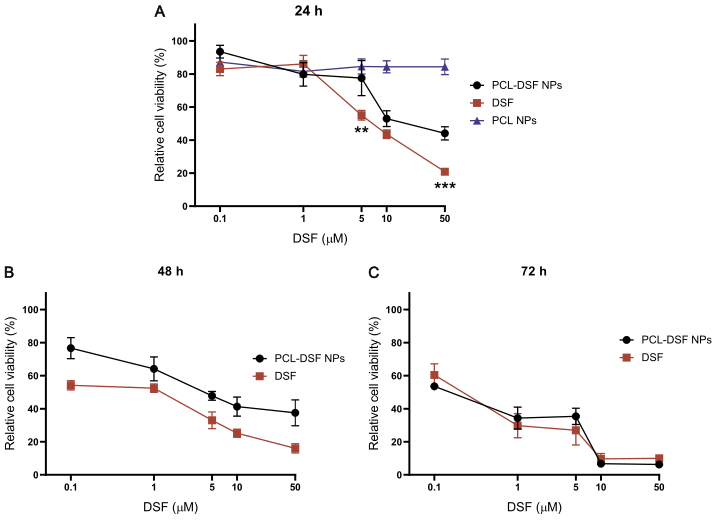


**Supplementary Figure 3.** **Cell viability analysis on A549 cell line.** A)Relative cell viability analysis on lung cancer cells A549, treated at different concentrations (0, 0.1, 1, 5, 10, and 50 μM) of PCL-DSF NPs and free DSF, and same proportion used at 0, 0.1, 1, 5, 10 and 50 μM of PCL NPs at 24 h, B) 48 h and C) 72 h. Data are presented as mean ± SEM with at least three independent experiments (n≥3) made in triplicate, and two-way ANOVA with posthoc Tukey multiple comparisons test. ** p<0.01, and *** p<0.001 compared between PCL-DSF NPs and DSF groups.


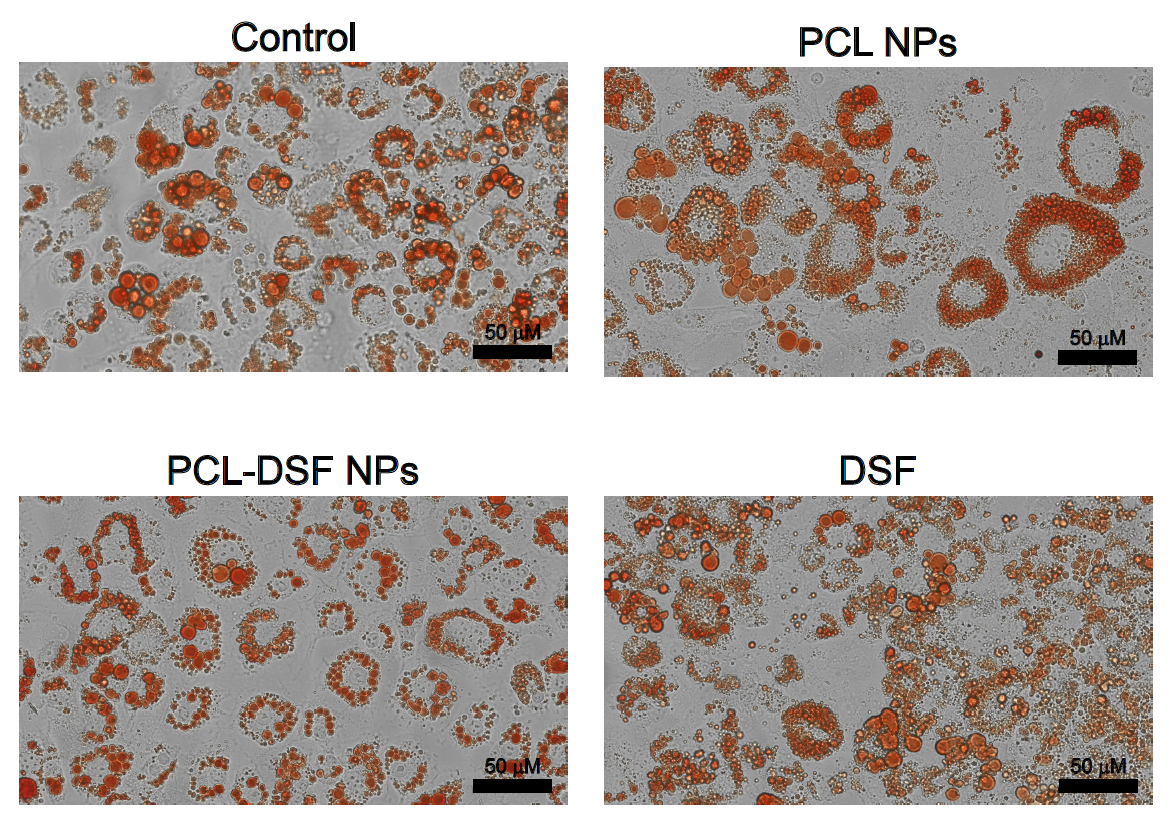


**Supplementary Figure 4. Lipid droplets on white-like adipocytes.** Representative images white-like adipocytes treated of not with PCL NPs, PCL-DSF or free DSF (10 µM) for 24 h and stained with oil red staining. Cells were visualized by light microscopy with 20X magnification. Scale bar = 50 µm., Germany) and the camera Zeiss-Axiocam 208 color (Zeiss, Oberkochen, Germany).


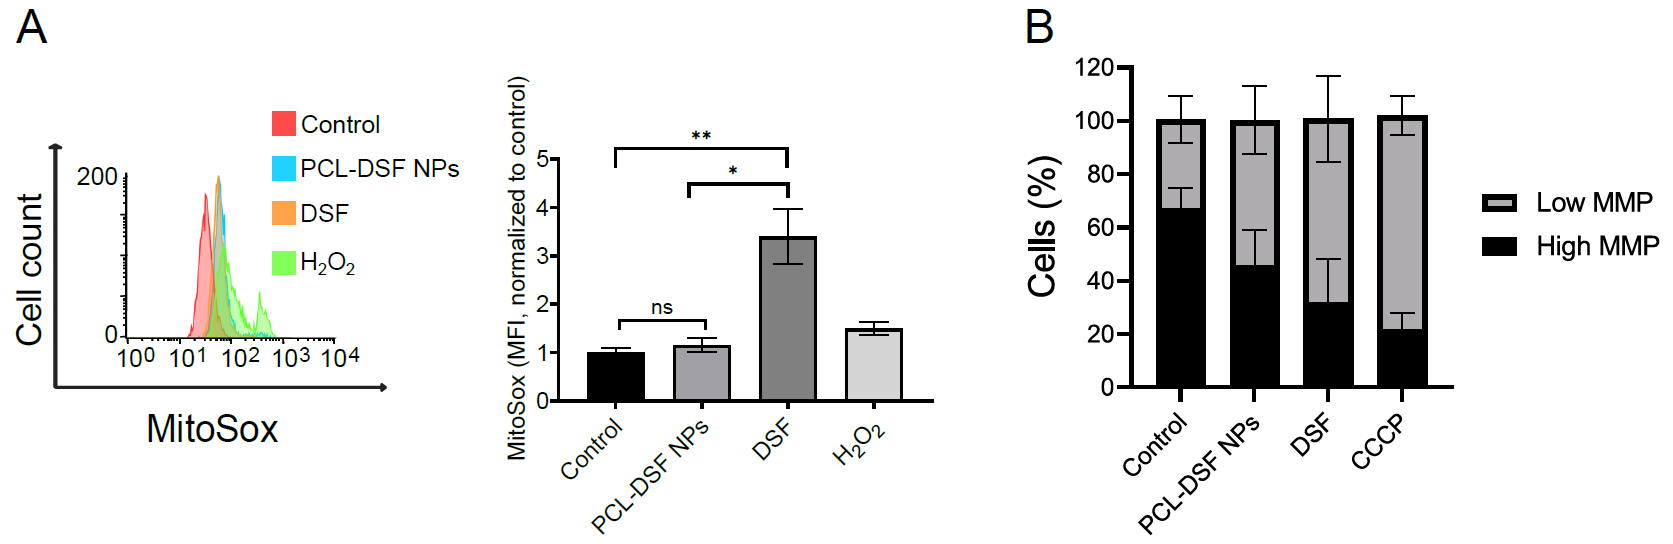


**Supplementary Figure 5. Mitochondrial damage analysis on A549 cells.** A) Representative mROS histograms (left) and quantification (right) by flow cytometry using Mitosox stain after 24 h exposure. B) DYm quantification by flow cytometry using JC-1 stain after 24 h exposure. The concentration of DSF, free or encapsulated, was 10 μM. Data are presented as mean ± SEM, with at least three independent experiments (n≥3) made in triplicate, and one-way ANOVA with posthoc Tukey multiple comparisons test. * p<0.05 and ** p<0.01.


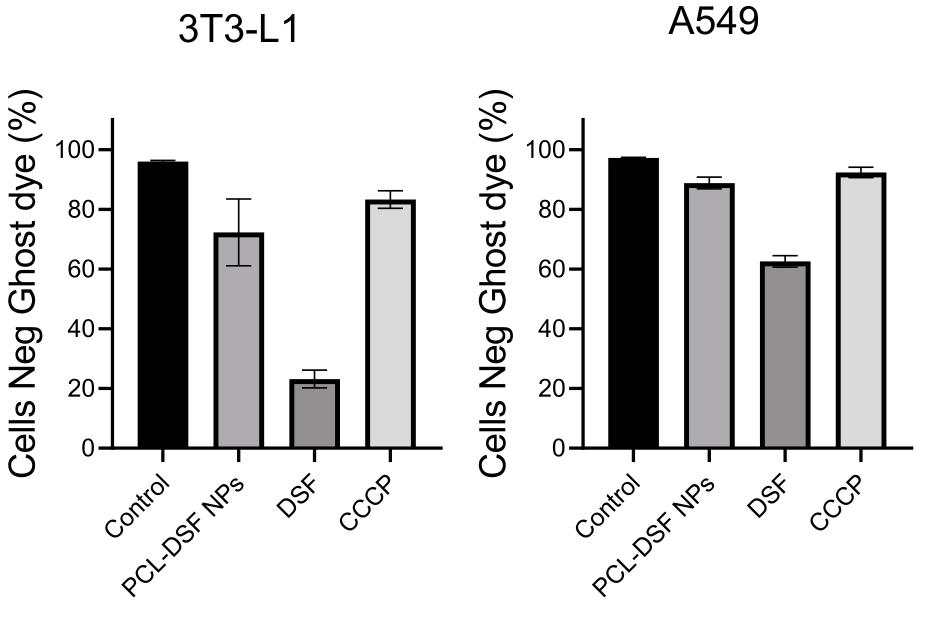


**Supplementary Figure 6. Cell viability quantification.** Quantification of cell viability quantification using Ghost dye stain by flow cytometry on preadipocytes 3T3-L1 and lung cancer A549 cells treated for 24 h with PCL-DSF NPs, free DSF or CCCP (80nM).


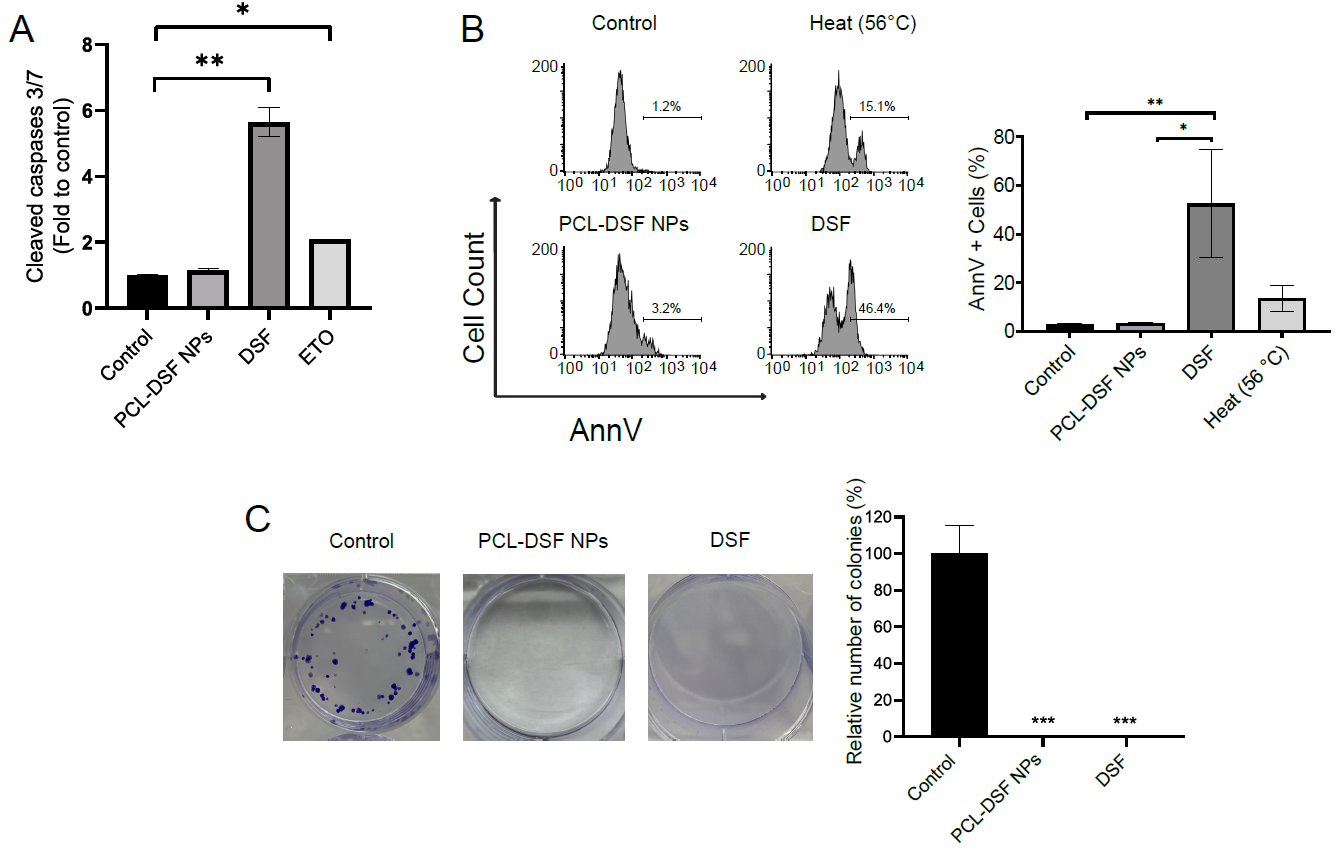
**Supplementary Figure 7. PCL-DSF NPs showed cytotoxicity similar to DSF on lung cancer A549 cells.** A) Quantification of effector caspases 3/7 cleaved by luminescent kit after 24 h exposure. B) Phosphatidylserine exposure representative histograms (left) and quantification (right) after 24 h exposure. C) Representative photographs of clonogenicity study (left) and clonogenicity analysis colony formation after 24 h exposure and 10 days of culture (right) in A549 cells. The concentration of DSF, either free or encapsulated, was 10 μM. Data are presented as mean ± SEM, with at least three independent experiments (n≥3) made in triplicate, and one-way ANOVA with posthoc Tukey multiple comparisons test. * p<0.05, ** p<0.01, and *** p<0.001.
